# Supplementary material for: Economic Evaluation of Interventions for Treatment of Neonatal Opioid Withdrawal Syndrome: A Review
Source: MDPI journal article supplement (doi:10.3390/children8070534), 2021-06-23
Supplement: s1 [file s1]

## Supplementary Materials

**File S1.** Systematic literature review search terms.

**Database:** MEDLINE (through OVID), CINAHL, Embase, ECONLIT, NHS Economic Evaluation Database and Web of Science

Inclusive dates: 2000 to October 31, 2020

Medline

(neonatal abstinence\* OR substance withdrawal syndrome OR 'substance withdrawal') AND (neonatal OR infant OR newborn) AND ('cost\* OR cost-analysis OR economic evaluat\* OR economic model\* OR cost-benefit OR cost-effective\*' OR cost-utility OR cost-minimisation)

Embase

((('neonatal abstinence syndrome' OR 'substance withdrawal syndrome' OR 'substance withdrawal') AND ('neonatal' OR 'infant' OR 'newborn' OR 'infant') AND ('opioid' OR 'cannabis' OR 'cannabinoids' OR 'benzodiazepines' OR 'amphetamine' OR 'buprenorphine' OR 'methadone' OR gabapentin' AND ('cost' OR 'cost-analysis' OR 'economic evaluation' OR 'economic model' OR 'increment cost-effect' OR 'economic' OR 'cost-benefit analysis' OR 'cost-effectiveness' OR 'cost-utility' OR 'cost-minimisation'))

Web of science

(TS= (neonatal abstinence syndrome) AND TS= (cost OR cost-analysis OR economic-evaluation OR economic-modelling OR 'incremental cost effectiveness' OR cost-benefit analysis OR cost-effectiveness OR cost-utility OR cost-minimisation) AND TS= (opioid OR cannabis OR cannabinoids OR benzodiazepines OR amphetamine OR buprenorphine OR methadone OR gabapentin)

CINAHL

TX ( neonatal abstinence syndrome or neonatal withdrawal syndrome or NAS or neonatal abstinence or neonatal withdrawal ) AND TX ( cost effectiveness or cost benefit or economics or cost management or economics or cost utility or cost ministration or economic model or incremental cost effectiveness ) AND TX ( opioid analgesics or opioids or opioid or cannabis or benzodiazepines or methadone or buprenorphine or gabapentin)

EconLIT NHS EED

TX ( neonatal abstinence syndrome or neonatal withdrawal syndrome or nas ) AND TX ( economy or economic or economics or economic impact or financial impact ) OR TX ( cost effectiveness or cost benefit or economics or cost management or economics ) AND TX opioid OR TX cannabis OR TX ( methadone or buprenorphine )
