# Supplementary figures and images for: Economic Evaluation of Interventions for Treatment of Neonatal Opioid Withdrawal Syndrome: A Review
Source: MDPI journal article supplement (doi:10.3390/children8070534), 2021-06-23

Supplementary Material

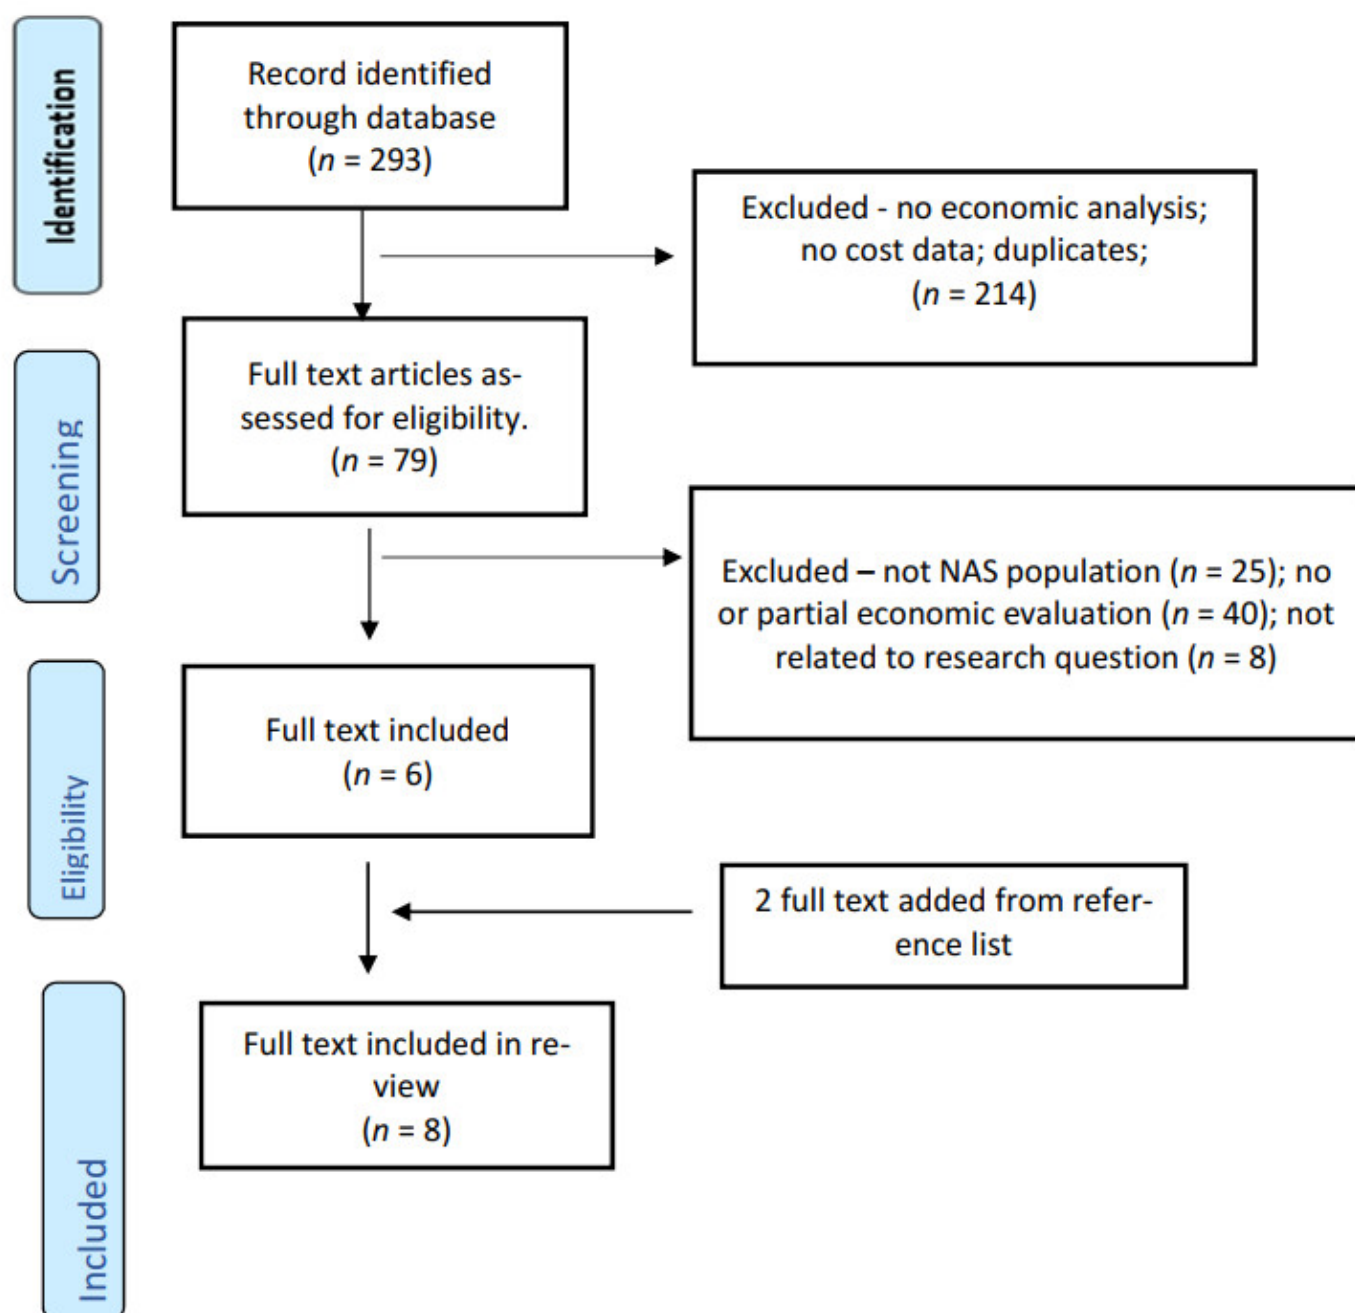

**Figure S1.** PRISMA Flow Diagram of search results.

Supplement: s1 [file s1]
